# Supplementary material
Source: MDPI journal article supplement (https://www.mdpi.com/2071-1050/13/21/11588)
Supplement: s1 [file s1]

Supplementary Material

# Seed Germination Ecophysiology of *Acacia dealbata* Link and *Acacia mearnsii* De Wild.: Two Invasive Species in the Mediterranean Basin

**Table S1.** GLMs results of imbibition test of the following factors: species (*A. dealbata* and *A. mearnsii*), populations (DEA IT, DEA FR1, DEA FR2, MEA IT, MEA FR, MEA PT) and treatment (scarified and non-scarified).

|            |      | Df | Deviance | Resid. Df | Resid Dev | F      | P (<F)                   |
|------------|------|----|----------|-----------|-----------|--------|--------------------------|
| Species    | NULL |    |          | 71        | 5.8881    |        |                          |
|            |      | 1  | 0.19092  | 70        | 5.6971    | 2.1386 | 0.1481                   |
| Population | NULL |    |          | 71        | 5.8881    |        |                          |
|            |      | 5  | 0.50077  | 66        | 5.3873    | 1.1229 | 0.3569                   |
| Treatment  | NULL |    |          | 71        | 2.88754   |        |                          |
|            |      | 3  | 2.5387   | 68        | 0.34882   | 164.97 | < 2.2e <sup>-16***</sup> |

Note: significance of P values code: '\*\*\*' P < 0.05.

**Table S2.** GLMs results of germination test with non-scarified seeds of the species (*A. dealbata* and *A. mearnsii*) factor.

|         |      | Df | Deviance | Resid. Df | Resid Dev | F      | P (<F)                   |
|---------|------|----|----------|-----------|-----------|--------|--------------------------|
| Species | NULL |    |          | 71        | 1345.20   |        |                          |
|         |      | 1  | 555.33   | 70        | 789.87    | 48.755 | 1.344e <sup>-09***</sup> |

Note: significance of P values code: '\*\*\*' P < 0.05.

**Table S3.** GLMs results of germination test with non-scarified seeds in *A. dealbata* populations of the following factors: populations (DEA IT, DEA FR1, DEA FR2) and temperature (15, 20 and 25 °C).

| <i>Acacia dealbata</i> |      | Df | Deviance | Resid. Df | Resid Dev | F      | P (<F)       |
|------------------------|------|----|----------|-----------|-----------|--------|--------------|
| Population             | NULL |    |          | 35        | 386.24    |        |              |
|                        |      | 3  | 43.391   | 32        | 342.85    | 1.399  | 0.2611       |
| Temperature            | NULL |    |          | 35        | 386.24    |        |              |
|                        |      | 2  | 152.49   | 33        | 233.75    | 11.521 | 0.0001604*** |

Note: significance of P values code: '\*\*\*' P < 0.05.

**Table S4.** GLMs results of germination test with non-scarified seeds in *A. mearnsii* populations of the following factors: populations (MEA IT, MEA FR, MEA PT) and temperature (15, 20 and 25 °C).

| <i>Acacia mearnsii</i> |      | Df | Deviance | Resid. Df | Resid Dev | F      | P (<F)                   |
|------------------------|------|----|----------|-----------|-----------|--------|--------------------------|
| Population             | NULL |    |          | 35        | 403.63    |        |                          |
|                        |      | 2  | 258.38   | 33        | 142.25    | 30.515 | 3.138e <sup>-08***</sup> |
| Temperature            | NULL |    |          | 35        | 403.63    |        |                          |
|                        |      | 2  | 21.561   | 33        | 382.07    | 0.906  | 0.4139                   |

Note: significance of P values code: '\*\*\*' P < 0.05.

**Table S5.** GLMs results of germination test with scarified seeds of the following factors: species (*A. dealbata* and *A. mearnsii*) and treatment (light and dark conditions).

|           |      | Df | Deviance | Resid. Df | Resid Dev | F      | P (<F)       |
|-----------|------|----|----------|-----------|-----------|--------|--------------|
| Species   | NULL |    |          | 287       | 14002     |        |              |
|           |      | 1  | 42.928   | 286       | 13959     | 0.5189 | 0.4719       |
| Treatment | NULL |    |          | 287       | 14002     |        |              |
|           |      | 1  | 2730.7   | 286       | 11272     | 60.712 | 1.229e-13*** |

Note: significance of *P* values code: '\*\*\*' *P* < 0.05.

**Table S6.** GLMs results of germination test with scarified seeds in *A. dealbata* populations of the following factors: populations (DEA IT, DEA FR1, DEA FR2), treatment (light and dark conditions) and temperature (5, 10, 15, 20, 25 °C and 25/10 °C).

| <i>Acacia mearnsii</i> |      | Df | Deviance | Resid. Df | Resid Dev | F      | P (<F)       |
|------------------------|------|----|----------|-----------|-----------|--------|--------------|
| Population             | NULL |    |          | 143       | 7183.5    |        |              |
|                        |      | 3  | 34.641   | 140       | 7148.9    | 0.1442 | 0.9332       |
| Treatment              | NULL |    |          | 143       | 7183.5    |        |              |
|                        |      | 1  | 1398.9   | 142       | 5784.6    | 31.829 | 8.807e-08*** |
| Temperature            | NULL |    |          | 143       | 7183.5    |        |              |
|                        |      | 5  | 3980.3   | 138       | 3203.2    | 40.794 | < 2.2e-16*** |

Note: significance of *P* values codes: '\*\*\*' *P* < 0.05.

**Table S7.** GLMs results of the germination test with scarified seeds in *A. mearnsii* populations of the following factors: populations (MEA IT, MEA FR, MEA PT), treatment (light and dark conditions) and temperature (5, 10, 15, 20, 25 °C and 25/10 °C).

| <i>Acacia mearnsii</i> |      | Df | Deviance | Resid. Df | Resid Dev | F      | P (<F)       |
|------------------------|------|----|----------|-----------|-----------|--------|--------------|
| Population             | NULL |    |          | 143       | 6776      |        |              |
|                        |      | 2  | 0        | 141       | 33645     | 0      | 1            |
| Treatment              | NULL |    |          | 143       | 6775.8    |        |              |
|                        |      | 1  | 1359.1   | 142       | 5416.7    | 29.403 | 2.463e-07*** |
| Temperature            | NULL |    |          | 143       | 6775.8    |        |              |
|                        |      | 5  | 4144.6   | 138       | 2631.3    | 52.156 | < 2.2e-16*** |

Note: significance of *P* values codes: '\*\*\*' *P* < 0.05.
